# Supplementary material
Source: PubMed Central journal article supplement (PMC117531)

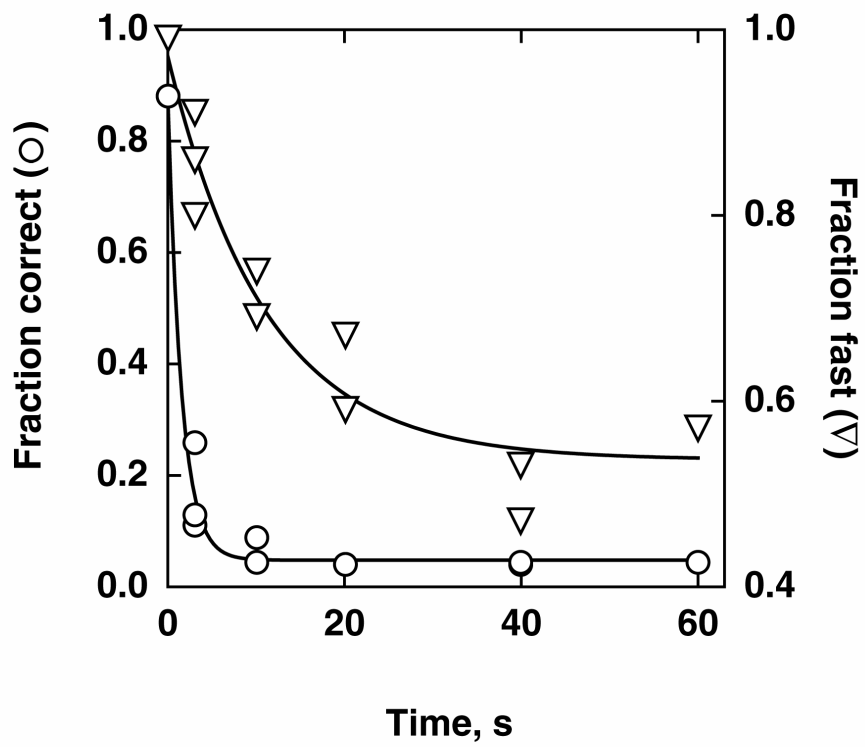

Supplement: pnas_221593598_3.pdf [file pnas_221593598_3.pdf]
